# Supplementary material for: Red Cell Distribution Width to Platelet Ratio Is Associated with Increasing In-Hospital Mortality in Critically Ill Patients with Acute Kidney Injury
Source: Hindawi journal article supplement (doi:10.1155/2022/4802702), 2022-01-17
Supplement: f1 [file 4802702.f1.pdf]

**Supplementary Table 1. Comparison of baseline characteristics in the surviving and non-surviving patients.**

| Variables                        | All patients<br>(n = 24166) | Surviving patients<br>(n = 16361) | Non-surviving patients<br>(n = 7805) | P value |
|----------------------------------|-----------------------------|-----------------------------------|--------------------------------------|---------|
| <b>Demographic features</b>      |                             |                                   |                                      |         |
| Age (years)                      | 68 (56-78)                  | 66 (54-76)                        | 71 (60-80)                           | < 0.001 |
| Male, n (%)                      | 13897 (57.5)                | 9510 (58.1)                       | 4387 (56.2)                          | 0.005   |
| Caucasian ethnicity, n (%)       | 17338 (71.7)                | 11647 (71.2)                      | 5691 (72.9)                          | 0.005   |
| <b>Comorbidities</b>             |                             |                                   |                                      |         |
| Congestive heart failure, n (%)  | 7823 (32.4)                 | 4554 (27.8)                       | 3269 (41.9)                          | < 0.001 |
| Chronic pulmonary, n (%)         | 5759 (23.8)                 | 3699 (22.6)                       | 2060 (26.4)                          | < 0.001 |
| Diabetes, n (%)                  | 7587 (31.4)                 | 5002 (30.6)                       | 2585 (33.1)                          | < 0.001 |
| Obesity, n (%)                   | 1776 (7.3)                  | 1422 (8.7)                        | 354 (4.5)                            | < 0.001 |
| <b>Laboratory parameters</b>     |                             |                                   |                                      |         |
| Bicarbonate (mmol/L)             | 23.5 (21-26)                | 24 (22.0-26.0)                    | 23.0 (20.0-25.0)                     | < 0.001 |
| Bilirubin (mg/dl)                | 0.6 (0.4-1.15)              | 0.6 (0.4-1.05)                    | 0.7 (0.4-1.5)                        | < 0.001 |
| Chloride (mmol/L)                | 105 (101.5-108)             | 105.5 (102-108.5)                 | 104 (100-108)                        | < 0.001 |
| Glucose (mg/dl)                  | 136.5 (116-165.5)           | 135.5 (117-161.5)                 | 139 (113.5-175.5)                    | < 0.001 |
| Hematocrit (%)                   | 32 (28.6-36)                | 32.5 (29-36.5)                    | 31.1 (28-35)                         | < 0.001 |
| Hemoglobin (g/dl)                | 10.7 (9.55-12.1)            | 10.9 (9.7-12.3)                   | 10.3 (9.3-11.6)                      | < 0.001 |
| Lactate (mmol/L)                 | 1.85 (1.35-2.65)            | 1.8 (1.3-2.55)                    | 2.0 (1.4-3.1)                        | < 0.001 |
| Potassium (mmol/L)               | 4.2 (3.85-4.65)             | 4.2 (3.85-4.6)                    | 4.25 (3.85-4.7)                      | < 0.001 |
| Sodium (mmol/L)                  | 138.5 (136-140.5)           | 138.5 (136-140.5)                 | 138 (136.5-141)                      | 0.983   |
| WBC (10 <sup>9</sup> /L)         | 11.2 (8.35-14.9)            | 11.15 (8.5-14.5)                  | 11.35 (8.1-15.7)                     | 0.118   |
| Lymphocyte, (%)                  | 11.5 (6.9-18.4)             | 12.4 (7.5-19.4)                   | 10 (5.6-16)                          | < 0.001 |
| Neutrophile, (%)                 | 80 (71.1-86.9)              | 79.4 (70.7-86.1)                  | 81.5 (72.6-88)                       | < 0.001 |
| APTT (seconds)                   | 32.2 (27.3-42)              | 31.5 (26.9-40)                    | 34.2 (28.1-46.9)                     | < 0.001 |
| INR (seconds)                    | 1.3 (1.15-1.6)              | 1.3 (1.15-1.5)                    | 1.4 (1.2-1.8)                        | < 0.001 |
| RDW (%)                          | 14.8 (13.8-16.4)            | 14.4 (13.6-15.7)                  | 15.8 (14.5-17.5)                     | < 0.001 |
| Platelet (10 <sup>9</sup> /L)    | 200 (146-267.5)             | 200.5 (150.5-264)                 | 198.5 (134-276)                      | 0.330   |
| NLR                              | 7.5 (4.2-12.5)              | 6.7 (3.7-11.6)                    | 9 (5.3-14.8)                         | < 0.001 |
| PLR                              | 159 (39.5-211)              | 137 (25.5-188)                    | 186 (40.2-263)                       | < 0.001 |
| <b>Scoring systems</b>           |                             |                                   |                                      |         |
| SOFA                             | 4 (2-7)                     | 4 (2-6)                           | 5 (3-8)                              | < 0.001 |
| SAPS II                          | 36 (24-46)                  | 34 (26-42)                        | 43 (35-54)                           | < 0.001 |
| <b>Therapies</b>                 |                             |                                   |                                      |         |
| Renal replacement therapy, n (%) | 1310 (5.4)                  | 623 (3.8)                         | 687 (8.8)                            | < 0.001 |
| Mechanical ventilation, n (%)    | 13457 (55.7)                | 9373 (57.3)                       | 4084 (52.3)                          | < 0.001 |
| Vasopressor use, n (%)           | 10532 (55.7)                | 6822 (41.7)                       | 3710 (47.5)                          | < 0.001 |
| <b>Vital signs</b>               |                             |                                   |                                      |         |
| SBP (mmHg)                       | 115 (106-128)               | 116 (107-128)                     | 113 (103-127)                        | < 0.001 |
| DBP (mmHg)                       | 59 (53-66)                  | 59 (54-66)                        | 57 (51-65)                           | < 0.001 |
| Temperature (°C)                 | 36.8 (36.4-37.2)            | 36.9 (36.5-37.2)                  | 36.7 (36.3-37.2)                     | < 0.001 |
| Respiratory rate (beats/min)     | 18 (16-21)                  | 18 (16-20)                        | 19 (17-23)                           | < 0.001 |

|                        |                     |                     |                     |         |
|------------------------|---------------------|---------------------|---------------------|---------|
| Heart rate (beats/min) | 85 (75-96)          | 84 (75-95)          | 86 (75-99)          | < 0.001 |
| SpO <sub>2</sub> (%)   | 97.6 (96.2-98.7)    | 97.7 (96.3-98.7)    | 97.4 (95.8-98.7)    | < 0.001 |
| Renal function         |                     |                     |                     |         |
| Creatinine, (mg/dl)    | 1.05 (0.8-1.6)      | 0.95 (0.75-1.35)    | 1.3 (0.9-2.3)       | < 0.001 |
| BUN, (mg/dl)           | 20.5 (14.5-33.5)    | 18 (13-27.5)        | 28 (18.5-46)        | < 0.001 |
| AKI stage, n (%)       |                     |                     |                     | < 0.001 |
| Stage 1                | 7010 (29.0)         | 5178 (31.6)         | 1832 (23.5)         |         |
| Stage 2                | 12015 (49.7)        | 8626 (52.7)         | 3389 (43.4)         |         |
| Stage 3                | 5141 (21.3)         | 2557 (15.6)         | 2584 (33.1)         |         |
| RPR                    | 0.077 (0.058-0.112) | 0.072 (0.055-0.098) | 0.094 (0.066-0.182) | < 0.001 |

APTT, activated partial thromboplastin time; AKI, acute kidney injury; BUN, blood urea nitrogen; DBP, diastolic blood pressure; INR, International Normalized Ratio; NLR, neutrophil to lymphocyte ratio; PLR, platelet to lymphocyte ratio; RDW, red cell distribution width; RPR, red cell distribution width to platelet ratio; SAPS II, simplified acute physiology score II; SBP, systolic blood pressure; SOFA, sequential organ failure assessment; SpO<sub>2</sub>, oxygen saturation; WBC, white blood cell.
